# Supplementary material for: Iridium-incorporated cobalt hydroxide electrodeposited on titanium meshes enabling electroreduction of nitrate and nitrobenzene to ammonia and aniline
Source: Royal Society of Chemistry journal article supplement (doi:10.1039/d4ta06667g), 2024-12-09
Supplement: d4ta06667g1.pdf [file d4ta06667g1.pdf]

## Electronic Supplementary Information

### Experimental section

#### Materials:

Titanium mesh (TM) was obtained from Qingyuan Metal Material Ltd. (Taixing, China). Potassium nitrate ( $\text{KNO}_3 \geq 99.0\%$ ), potassium nitrate isotope ( $\text{K}^{15}\text{NO}_3 \geq 98.5\%$ ), potassium nitrite ( $\text{KNO}_2 \geq 9.0\%$ ), potassium sulfate ( $\text{K}_2\text{SO}_4 \geq 99.0\%$ ), ammonium chloride ( $\text{NH}_4\text{Cl} \geq 99.5\%$ ) potassium hydroxide ( $\text{KOH} \geq 99.0\%$ ), sodium salicylate ( $\text{C}_7\text{H}_5\text{NaO}_3$ , 99.0%), trisodium citrate dihydrate ( $\text{C}_6\text{H}_5\text{Na}_3\text{O}_7 \cdot 2\text{H}_2\text{O}$ , 99.0%), p-dimethylaminobenzaldehyde ( $\text{C}_9\text{H}_{11}\text{NO}$ , AR), sodium nitroferricyanide dihydrate ( $\text{C}_5\text{FeN}_6\text{Na}_2\text{O} \cdot 2\text{H}_2\text{O}$ , 99.0%), sulfamic acid solution ( $\text{H}_3\text{NO}_3\text{S}$ , 0.8 wt%) and sodium hypochlorite solution ( $\text{NaClO}$ , 4.0 wt%) Nitrobenzene Standard ( $\text{C}_6\text{H}_5\text{NO}_2$ , AR) were purchased from Aladdin Ltd. (Shanghai, China). Sodium hexachloroiridate(III) hydrate ( $\text{Na}_3\text{IrCl}_6 \cdot x\text{H}_2\text{O}$ , Ir 35%~40%) and Cobalt chloride hexahydrate ( $\text{CoCl}_2 \cdot 6\text{H}_2\text{O}$ , AR) were purchased from Chengdu Kelong Chemical Reagent Co. Ltd. Sulfuric acid ( $\text{H}_2\text{SO}_4$ , 95.0%~98.0%), hydrogen peroxide ( $\text{H}_2\text{O}_2$ ,  $\geq 30\%$ ), hydrochloric acid ( $\text{HCl}$ , 36.0%~38.0%), hydrazine monohydrate ( $\text{N}_2\text{H}_4 \cdot \text{H}_2\text{O}$ ,  $> 98.0\%$ ) and ethyl alcohol ( $\text{C}_2\text{H}_5\text{OH}$ , 99.5%) were bought from Beijing Chemical Corporation. (China) chemical Ltd. in Chengdu. Aniline ( $\text{C}_6\text{H}_7\text{N}$ , 99+%) were bought from Alfa Aesar (China) chemical Ltd. All reagents used in this work were analytical grade without further purification.

#### Characterizations:

XRD data were acquired by a LabX XRD-6100 X-ray diffractometer with a Cu  $\text{K}\alpha$  radiation (40 kV, 30 mA) of wavelength 0.154 nm (SHIMADZU, Japan). SEM measurements were carried out on a GeminiSEM 300 scanning electron microscope (ZEISS, Germany) at an accelerating voltage of 5 kV. XPS measurements were performed on an ESCALABMK II X-ray photoelectron spectrometer using Mg as the exciting source. The absorbance data of the spectrophotometer was measured on a UV-Vis spectrophotometer. TEM image was obtained from a Zeiss Libra 200FE transmission electron microscope operated at 200 kV.  $^1\text{H}$  NMR spectra were

---

collected on Varian VNMRS 600 MHz (the USA). GC results were obtained from GC-2010 pro.

### **Determination of NH<sub>3</sub>:**

The concentration of produced NH<sub>3</sub> was determined by spectrophotometry measurement with the indophenol blue method (the obtained electrolyte was diluted 50 times) [1]. In detail, 2 mL of the diluted catholyte was obtained from the cathodic chamber and mixed with 2 mL of a 1 M NaOH solution that contained salicylic acid and sodium citrate. Then, 1 mL of 0.05 M NaClO and 0.2 mL of 1 wt% C<sub>5</sub>FeN<sub>6</sub>Na<sub>2</sub>O were dropped into the collected electrolyte solution. After standing at room temperature for 2 h, the ultraviolet-visible absorption spectrum was measured. The concentration-absorbance curve was calibrated using the standard NH<sub>4</sub>Cl solution with NH<sub>3</sub> concentrations of 0.5, 1.0, 2.0, 3.0, 4.0 and 5.0 ppm in 0.1 M KOH. The absorbance at 655 nm was measured to quantify the NH<sub>3</sub> concentration using standard NH<sub>4</sub>Cl solutions ( $y = 0.37315 x + 0.05594$ ,  $R^2 = 0.999$ ).

### **Determination of NO<sub>2</sub><sup>-</sup>:**

The NO<sub>2</sub><sup>-</sup> concentration was analyzed using the Griess test [2]. The Griess reagent was prepared by dissolving 0.1 g N-(1-naphthyl) ethylenediamine dihydrochloride, 1.0 g sulfonamide and 2.94 mL H<sub>3</sub>PO<sub>4</sub> in 50 mL deionized water. In a typical colourimetric assay, the 1.0 mL Griess reagent was mixed with the 1.0 mL nitrite-containing solution and 2.0 mL H<sub>2</sub>O and allowed to react at room temperature for 10 min, in which sulfonamide reacts with NO<sub>2</sub><sup>-</sup> to form a diazonium salt and then further reacts with the amine to form an azo dye (magenta). The absorbance at 540 nm was measured to quantify the NO<sub>2</sub><sup>-</sup> concentration with a standard curve of NO<sub>2</sub><sup>-</sup> ( $y = 0.20024 x + 0.00407$ ,  $R^2 = 0.999$ ).

### **Determination of N<sub>2</sub>H<sub>4</sub>:**

In this work, we used the method of Watt and Chrisp [3] to determine the concentration of produced N<sub>2</sub>H<sub>4</sub>. The chromogenic reagent was a mixed solution of

---

5.99 g C<sub>9</sub>H<sub>11</sub>NO, 30 mL HCl and 300 mL C<sub>2</sub>H<sub>5</sub>OH. In detail, 1 mL electrolyte was added into 1 mL prepared colour reagent and stirred for 15 min in the dark. The absorbance at 455 nm was measured to quantify the N<sub>2</sub>H<sub>4</sub> concentration with a standard curve of hydrazine ( $y = 1.07368x + 0.02127$ ,  $R^2 = 0.999$ ).

#### **<sup>15</sup>N isotope labeling experiments:**

K<sup>15</sup>NO<sub>3</sub> was used as the feeding N-source for the isotopic labeling nitrate reduction experiments to clarify the source of ammonia. After electrolysis in 0.1 M KOH with 0.1 M <sup>15</sup>NO<sub>3</sub><sup>-</sup> or <sup>14</sup>NO<sub>3</sub><sup>-</sup> at -0.2 V for 1 h, the H value of the obtained electrolyte was adjusted to 2.0 by adding 0.1 M HCl solution. Then, 0.5 mL of electrolyte and 0.05 mL of D<sub>2</sub>O were added into the <sup>1</sup>HNMR tube for further <sup>1</sup>HNMR

#### **Calculations of FE and NH<sub>3</sub> yield:**

$$FE = (8 \times F \times [\text{NH}_3] \times V) / (M_{\text{NH}_3} \times Q) \times 100\%$$

$$\text{NH}_3 \text{ yield} = ([\text{NH}_3] \times V) / ((M_{\text{NH}_3} \times t \times A))$$

Where F is the Faradic constant (96485 C mol<sup>-1</sup>), [NH<sub>3</sub>] is the measured NH<sub>3</sub> concentration, V is the volume of electrolyte in the anode compartment (50 mL), M<sub>NH<sub>3</sub></sub> is the molar mass of NH<sub>3</sub>, Q is the total quantity of applied electricity, t is the electrolysis time and A is the loaded area of catalyst (0.5 × 0.5 cm<sup>2</sup>).

#### **Calculations of FE and NO<sub>2</sub><sup>-</sup> yield:**

$$FE = (2 \times F \times [\text{NO}_2^-] \times V) / (M_{\text{NO}_2^-} \times Q) \times 100\%$$

$$\text{NO}_2^- \text{ yield} = ([\text{NO}_2^-] \times V) / ((M_{\text{NO}_2^-} \times t \times A))$$

Where F is the Faradic constant (96485 C mol<sup>-1</sup>), [NO<sub>2</sub><sup>-</sup>] is the measured NO<sub>2</sub><sup>-</sup> concentration, V is the volume of electrolyte in the anode compartment (50 mL), M<sub>NO<sub>2</sub><sup>-</sup></sub> is the molar mass of NO<sub>2</sub><sup>-</sup>, Q is the total quantity of applied electricity, t is the electrolysis time and A is the loaded area of catalyst (0.5 × 0.5 cm<sup>2</sup>).

---

**Ph-NO<sub>2</sub> ERR:** The electrolyte was collected and extracted with ethylacetate after i-t tests. The extracted products were determined by comparing the GC retention times and mass spectra. The Ph-NO<sub>2</sub> conversion and Ph-NH<sub>2</sub> yield were acquired via the GC results analysis and calculated based on the following

Conversion = mol of the consumed Ph-NO<sub>2</sub> / mole of the added Ph-NO<sub>2</sub> × 100%

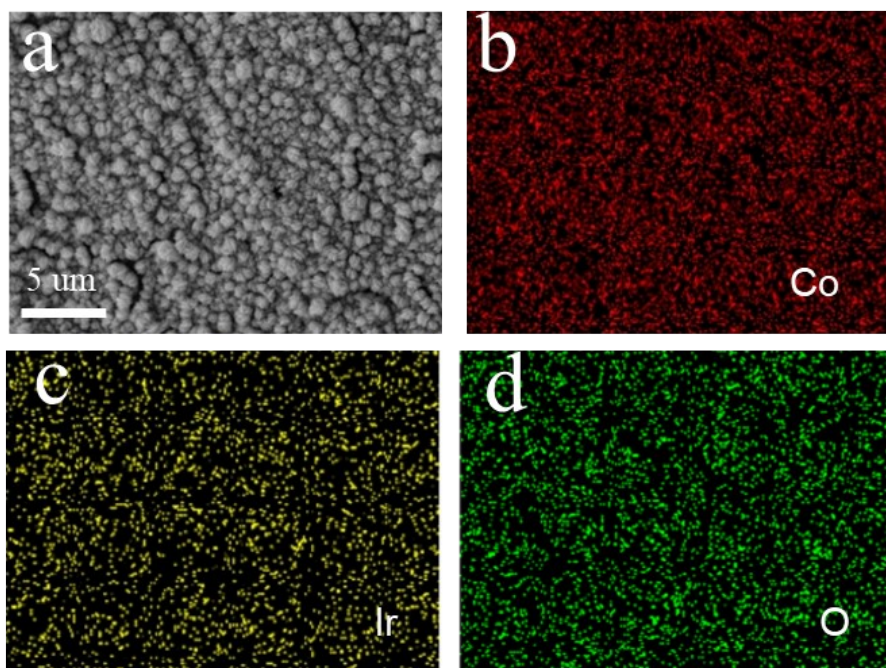

**Fig. S1.** (a) SEM image of Ir@Co(OH)<sub>2</sub>/TM. EDX mapping image of (b) Co, (c) Ir and (d) O of Ir@Co(OH)<sub>2</sub>/TM.

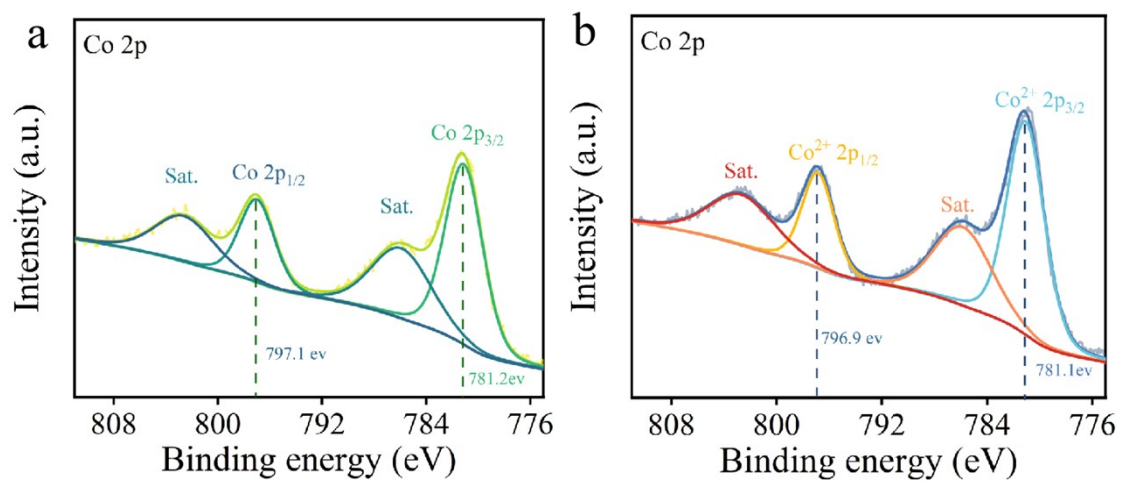

**Fig. S2.** XPS spectra of (a) Co(OH)<sub>2</sub>/TM in the Co 2p region and (b) Ir@Co(OH)<sub>2</sub>/TM in the Co 2p region.

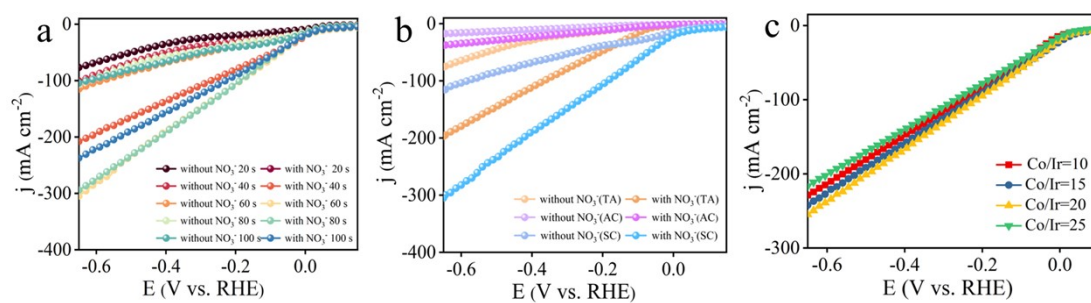

**Fig. S3.** LSV curves of Ir@Co(OH)<sub>2</sub>/TM samples prepared at different (a) electrodeposition time; (b) different ligands in 0.1 M KOH with 0.1 M KNO<sub>3</sub>; (c) different Co/Ir molar ratio.

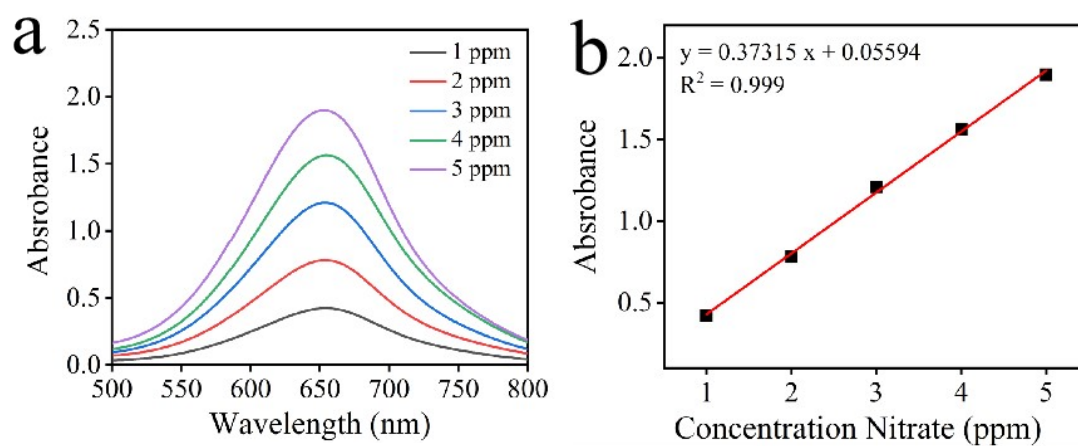

**Fig. S4.** (a) UV-Vis absorption spectra of indophenol assays kept with different concentrations of  $\text{NH}_4^+$  after incubated for 2 h at room temperature; (b) Calibration curve used for estimation of  $\text{NH}_4^+$  concentration.



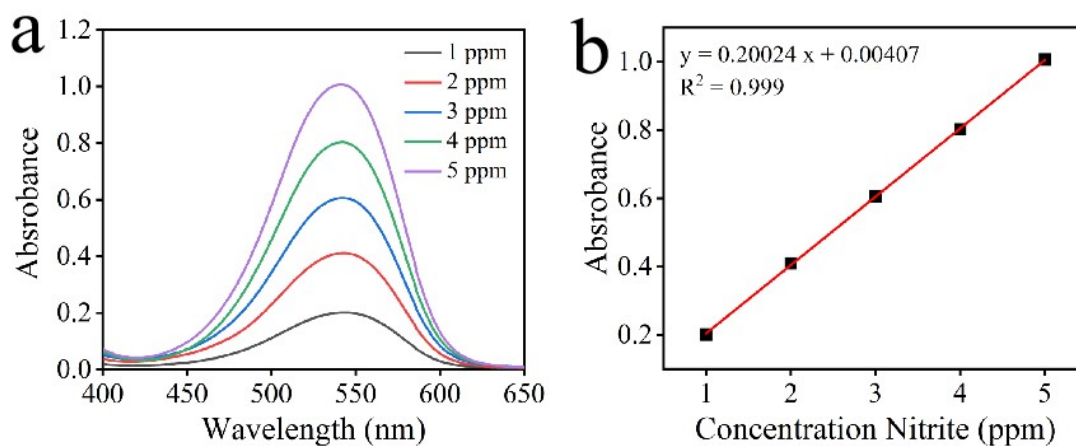

**Fig. S5.** UV-Vis absorption spectra of various  $\text{NO}_2^-$  concentrations after incubated for 10 min at room temperature; (b) Calibration curve used for quantification of  $\text{NO}_2^-$  concentration.

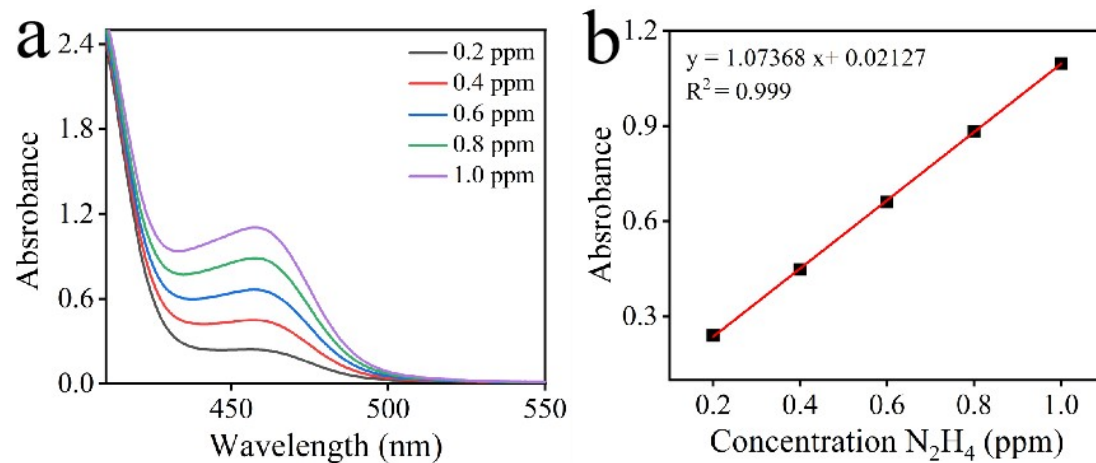

**Fig. S6.** (a) UV-Vis absorption spectra of various  $N_2H_4$  concentrations after incubated for 15 min at room temperature; (b) Calibration curve used for calculation of  $N_2H_4$  concentration.

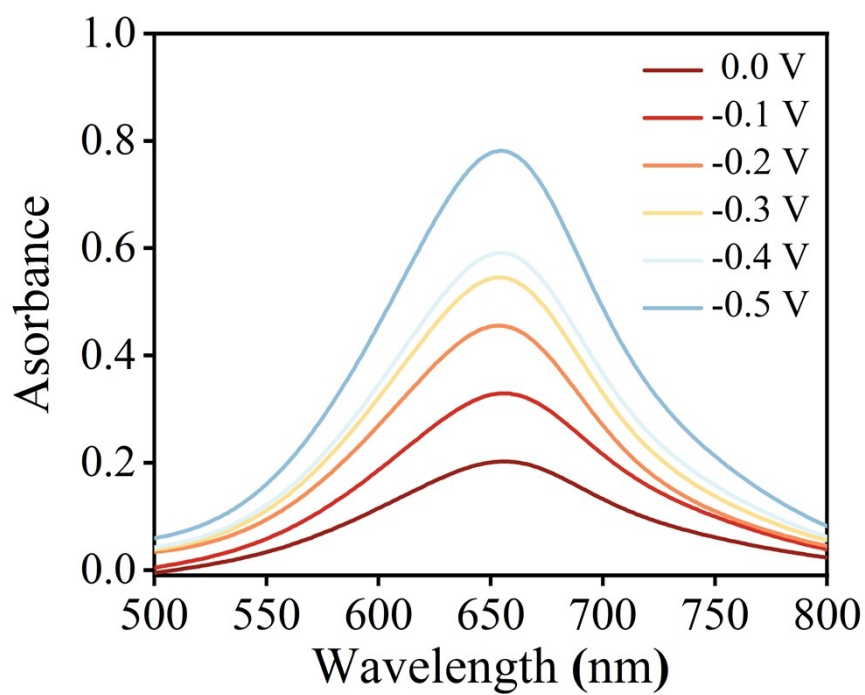

**Fig. S7.** (a) UV-Vis spectra of NH<sub>3</sub> generated on Ir@Co(OH)<sub>2</sub>/TM at different given potentials in the 0.1 M KOH with 0.1 M NO<sub>3</sub><sup>-</sup>.

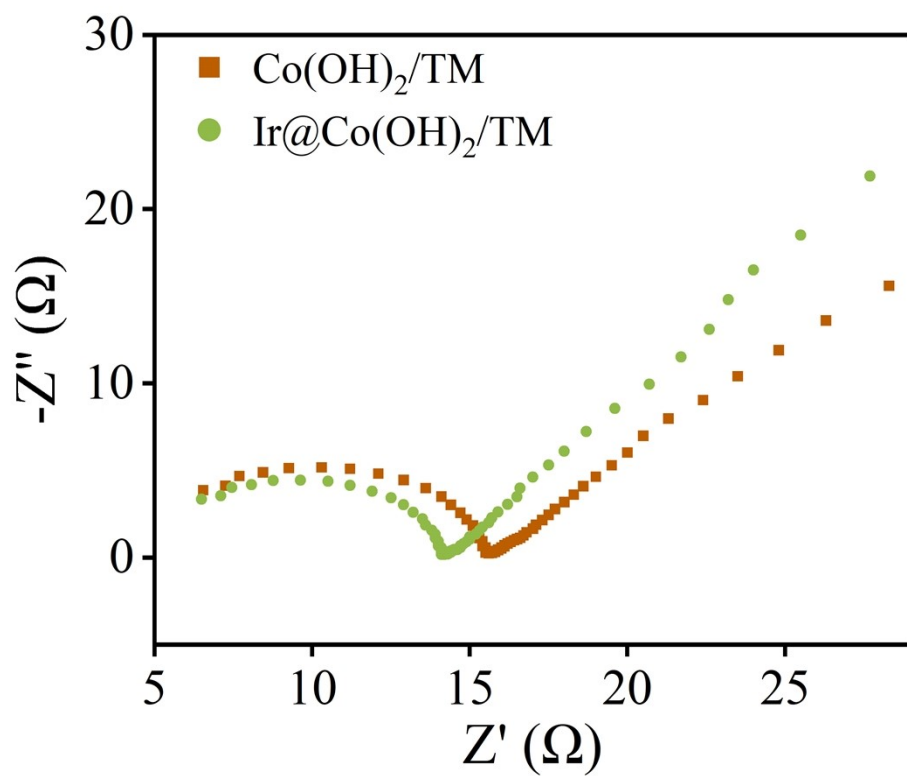

**Fig. S8.** Nyquist plots of different samples

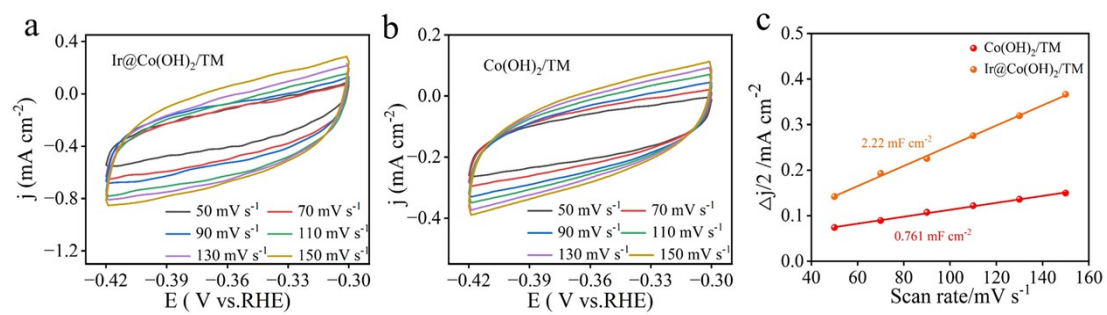

**Fig. S9.** The CV profiles obtained with (a) Ir@Co(OH)<sub>2</sub>/TM and (b) Co(OH)<sub>2</sub>/TM at different scan rates from 50 mV/s to 150 mV/s. (c) The corresponding fitting results of  $C_{dl}$ .

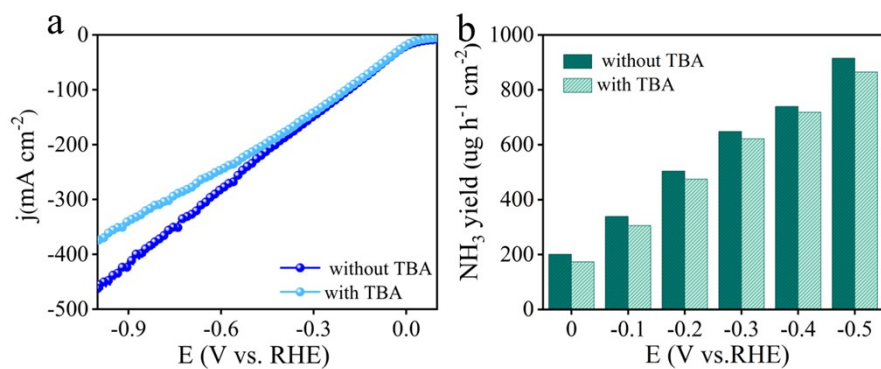

**Fig. S10.** (a) Different LSV curves of Ir@Co(OH)<sub>2</sub>/TM with or without TBA; (b) NH<sub>3</sub> yields and FEs of Ir@Co(OH)<sub>2</sub>/TM from 0 V to -0.5 V

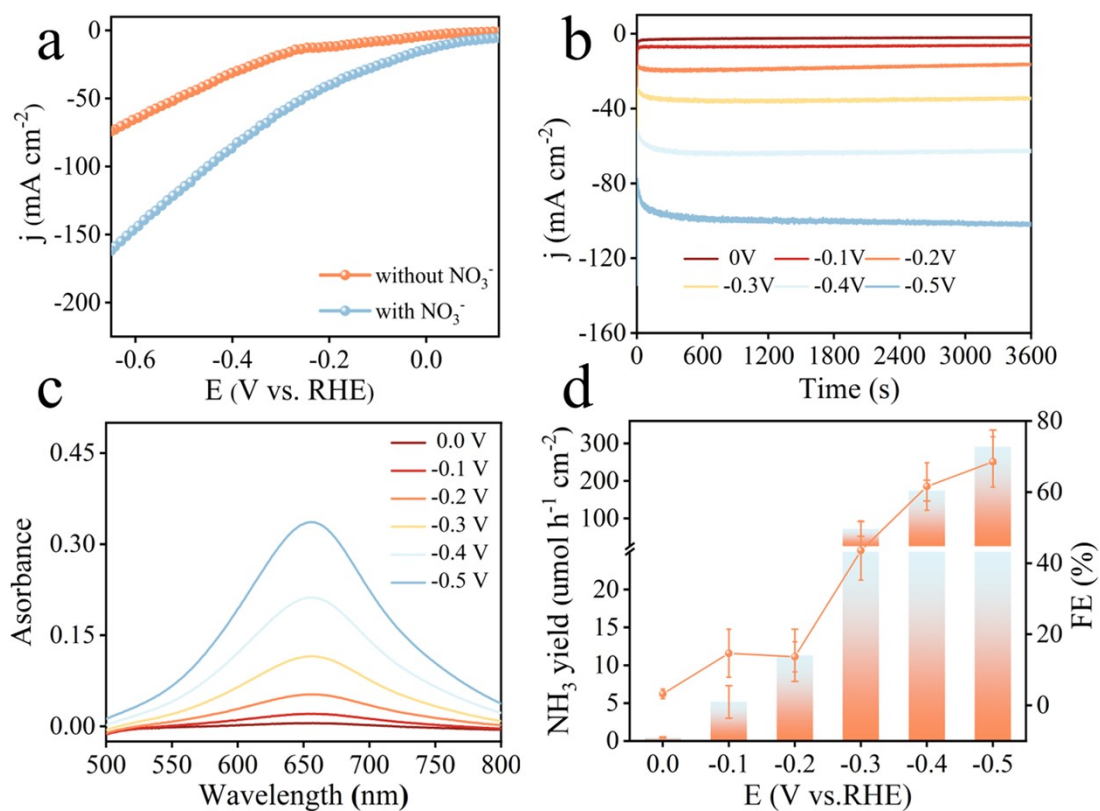

**Fig. S11.** (a) LSV curves of Ir@Co(OH)<sub>2</sub>/TM, Co(OH)<sub>2</sub>/TM and TM in neutral medium; (b) The chronoamperometry test curves of Ir@Co(OH)<sub>2</sub>/TM at each given potential in neutral medium. (c) UV-vis spectra of produced NH<sub>3</sub>; (d) NH<sub>3</sub> yields and FEs of Ir@Co(OH)<sub>2</sub>/TM from 0 V to -0.5 V.

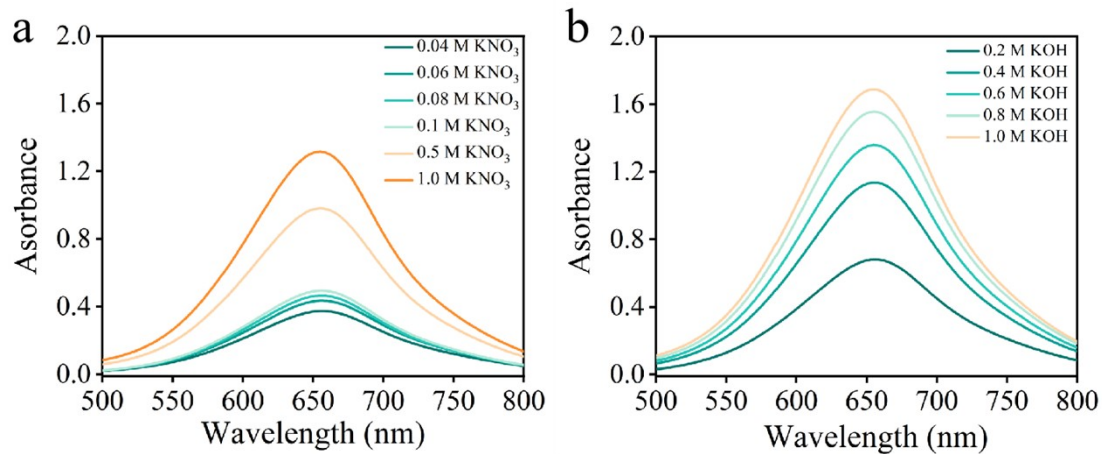

**Fig. S12.** UV-Vis spectra of  $\text{NH}_3$  generated on  $\text{Ir@Co(OH)}_2/\text{TM}$  at different; (a)  $\text{C}_{\text{NO}_3^-}$ - (b)  $\text{C}_{\text{OH}^-}$ -



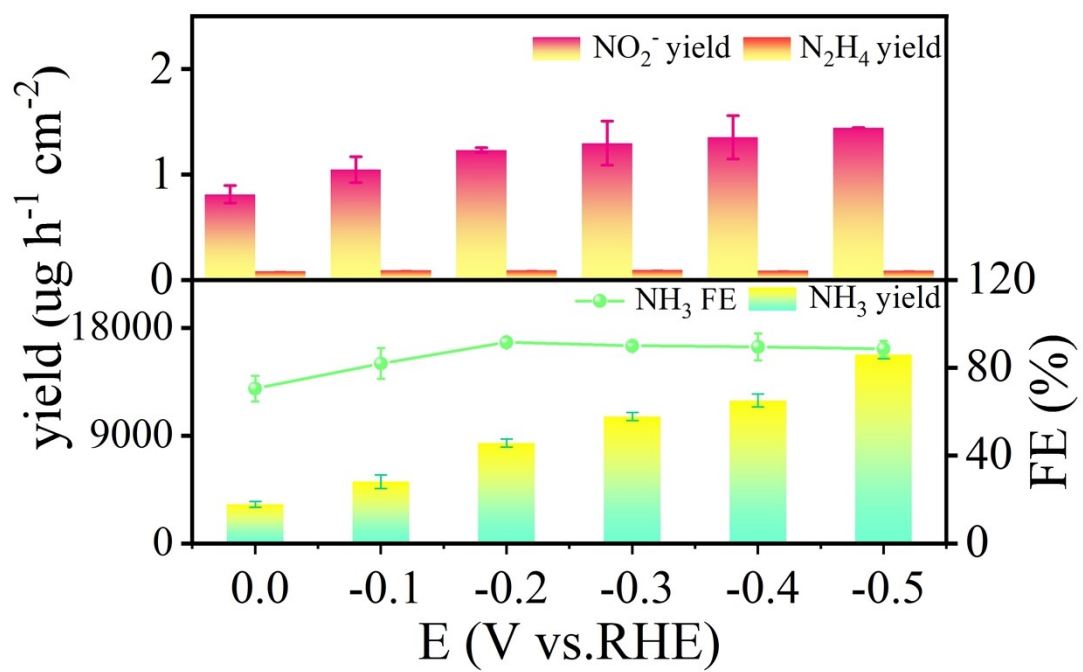

**Fig. S13.** By-product yield and FEs.

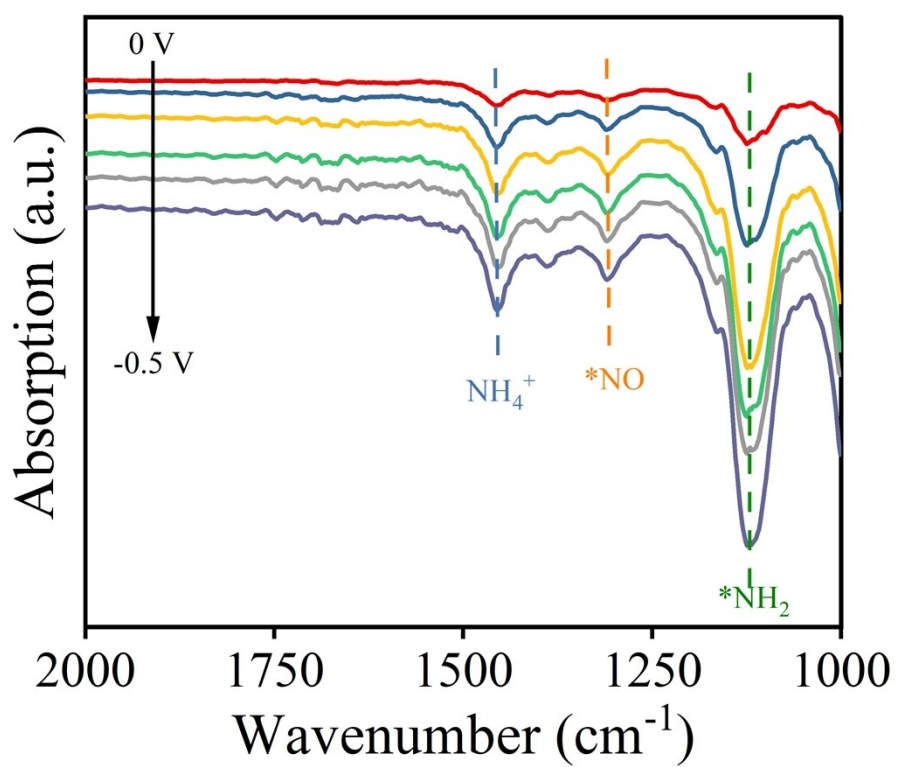

**Fig. S14.** Fourier transform infrared spectroscopy (FTIR) tests on Ir-Co(OH)<sub>2</sub>/TM at various potentials within an alkaline NO<sub>3</sub><sup>-</sup> medium

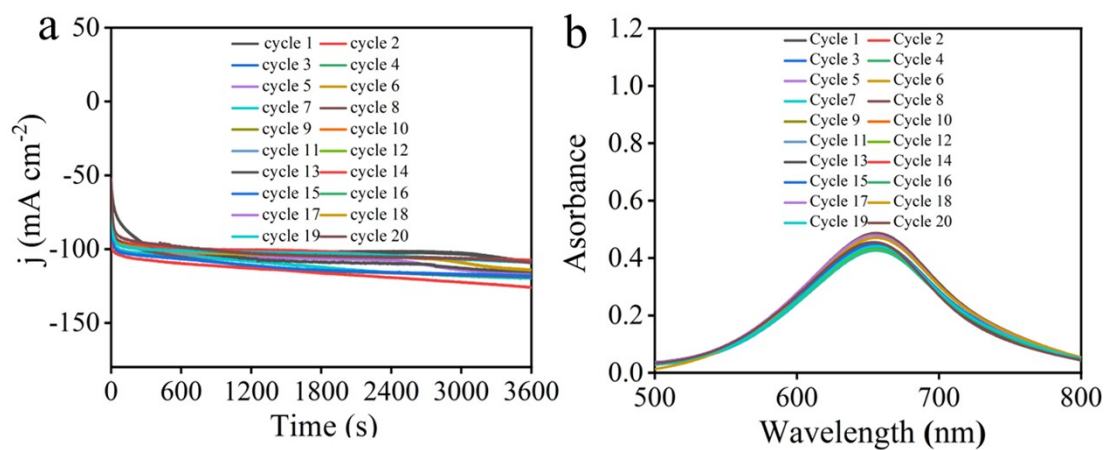

**Fig. S15.** (a) Chronoamperometry curves and (b) corresponding UV-Vis absorption spectra of Ir@Co(OH)<sub>2</sub>/TM for generated NH<sub>3</sub> during cycling tests at -0.2 V.

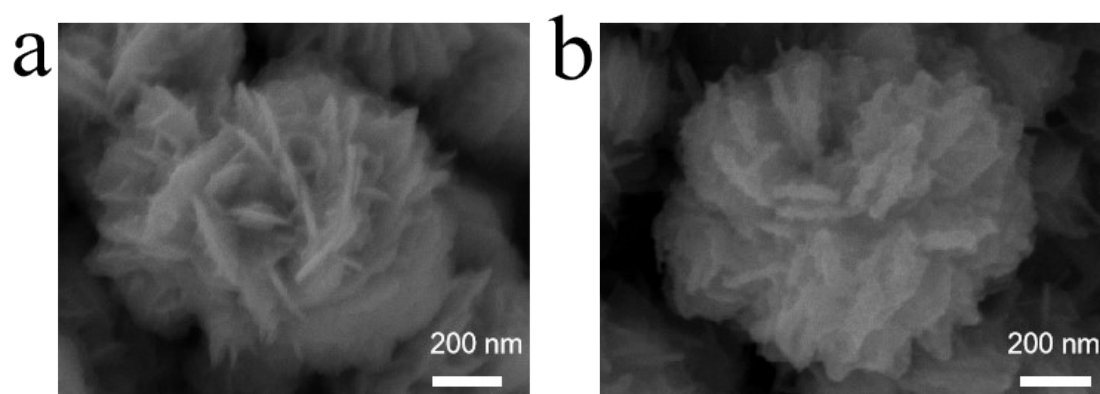

**Fig. S16.** SEM image of Ir@Co(OH)<sub>2</sub>/TM (a) before the 24-h stability test; (b) after the 24-h stability test in 0.1 M KOH with 0.1 M KNO<sub>3</sub>.

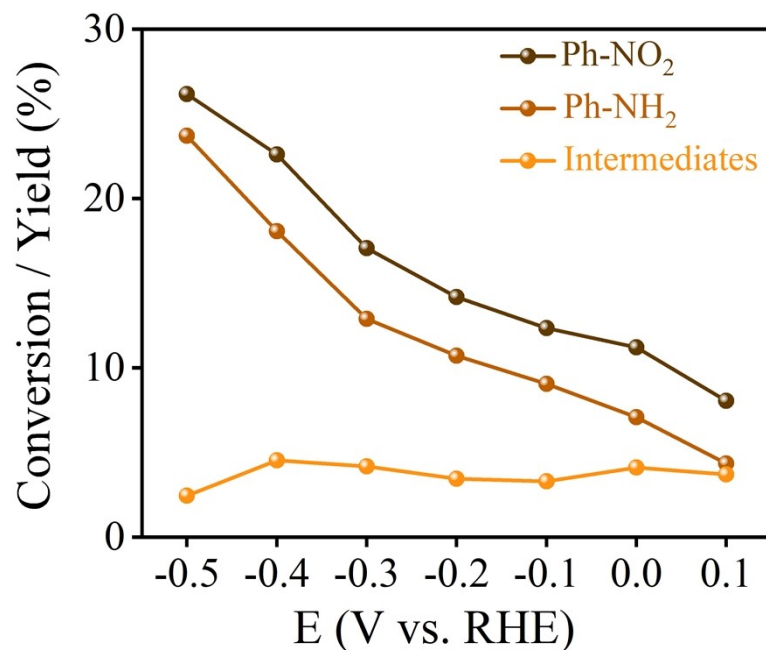

**Fig. S17.** Conversion and yield for Ph-NO<sub>2</sub> ERR from 0 V to -0.5 V

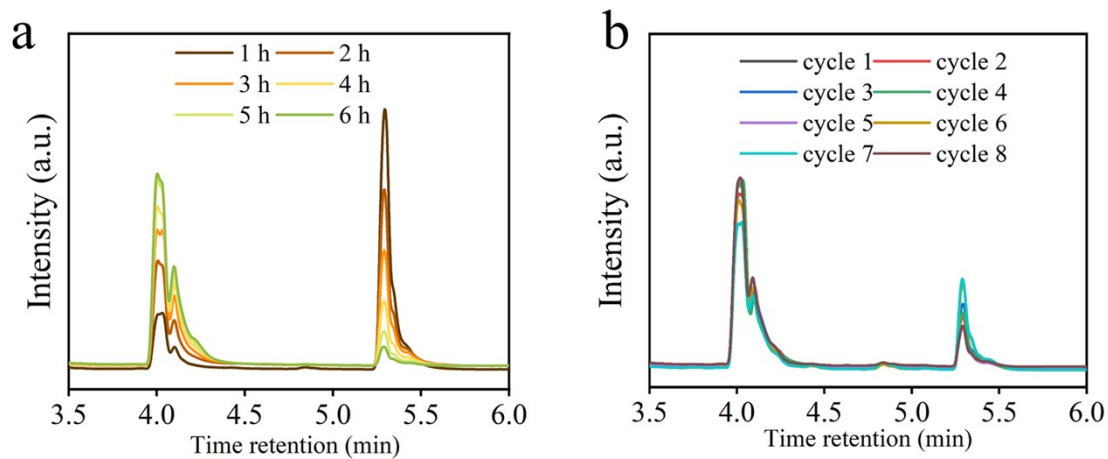

**Fig. S18.** (a) GC results for Ph-NO<sub>2</sub> ERR of Ir@Co(OH)<sub>2</sub>/TM at -0.5 V (vs RHE) with various time. (b) GC results for Ph-NO<sub>2</sub> ERR of cycling test.

**Table S1.** Comparison of catalytic performance of Ir@Co(OH)<sub>2</sub>/TM with other reported NO<sub>3</sub>RR electrocatalysts.

| Catalyst                                                 | Electrolyte                                                                      | NH <sub>3</sub> yield@Potential<br>(V vs. RHE)                      | FE@Potential<br>(V vs. RHE)  | Ref.                 |
|----------------------------------------------------------|----------------------------------------------------------------------------------|---------------------------------------------------------------------|------------------------------|----------------------|
| <b>Ir@Co(OH)<sub>2</sub>/<br/>TM</b>                     | <b>0.1 M KOH<br/>(0.1 M KNO<sub>3</sub>)</b>                                     | <b>493.0 ± 19.2 μmol h<sup>-1</sup> cm<sup>-2</sup><br/>@-0.2</b>   | <b>91.6 ± 2.2<br/>%@-0.2</b> | <b>This<br/>work</b> |
| Co <sub>3</sub> O <sub>4</sub> /Co                       | 0.1 M Na <sub>2</sub> SO <sub>4</sub><br>(1000ppm NaNO <sub>3</sub> )            | 261 μmol h <sup>-1</sup> cm <sup>-2</sup> @-0.8                     | 88.7%@-0.8                   | [4]                  |
| Co/CoO NSA                                               | 0.1 M Na <sub>2</sub> SO <sub>4</sub><br>(3.23 mM NaNO <sub>3</sub> )            | 195 μmol h <sup>-1</sup> cm <sup>-2</sup> @-0.65                    | 93.8%@-0.65                  | [5]                  |
| Co <sub>2</sub> B@Co <sub>3</sub> O <sub>4</sub> /<br>TM | 0.1 M NaOH<br>(0.1 M NaNO <sub>3</sub> )                                         | 301.8 μmol h <sup>-1</sup> cm <sup>-2</sup> @-0.7                   | 97.0%@-0.70                  | [6]                  |
| Co-Fe@Fe <sub>2</sub> O <sub>3</sub>                     | 0.1 M Na <sub>2</sub> SO <sub>4</sub><br>(500 ppm NO <sub>3</sub> <sup>-</sup> ) | 88 μmol h <sup>-1</sup> cm <sup>-2</sup> @-0.75                     | 85.2%@-0.75                  | [7]                  |
| Co-NCNT                                                  | 0.1 M NaOH<br>(0.1 M NO <sub>3</sub> <sup>-</sup> )                              | 350 μmol h <sup>-1</sup> mg <sub>cat.</sub> <sup>-1</sup> @-<br>0.6 | 92.0%@-0.6                   | [8]                  |
| Co@CC                                                    | 0.1 M NaOH<br>(0.1 M NaNO <sub>3</sub> )                                         | 600 μmol h <sup>-1</sup> cm <sup>-2</sup> @-0.8                     | 93.4%@-.8                    | [9]                  |
| Cu                                                       | 1 M NaOH<br>(0.1 M NO <sub>3</sub> <sup>-</sup> )                                | /                                                                   | 79.0%                        | [10]                 |
| ZnCo <sub>2</sub> O <sub>4</sub>                         | 0.1 M KOH<br>(0.1 M NO <sub>3</sub> <sup>-</sup> )                               | 120 μmol h <sup>-1</sup> mg <sub>cat.</sub> <sup>-1</sup> @-0.6     | 95.4%@-0.4                   | [11]                 |
| Cu <sub>2-x</sub> S/MoS <sub>2</sub>                     | 0.5 M Na <sub>2</sub> SO <sub>4</sub><br>(100 ppm NO <sub>3</sub> <sup>-</sup> ) | 178 μmol h <sup>-1</sup> cm <sup>-2</sup> @-0.1                     | 84.5%@-0.1                   | [12]                 |
| Co/MWCNTs                                                | 0.1 M KOH<br>(0.1 M NO <sub>3</sub> <sup>-</sup> )                               | 237 μmol h <sup>-1</sup> cm <sup>-2</sup> @-0.16                    | 84.72%@-0.16                 | [13]                 |
| BCN@Ni                                                   | 0.1 M KOH<br>(0.1 M NO <sub>3</sub> <sup>-</sup> )                               | 140 μmol h <sup>-1</sup> cm <sup>-2</sup> @-0.5                     | 91.2%@-0.3                   | [14]                 |
| Cu/Cu <sub>2</sub> O/RuO <sub>2</sub> @<br>C             | 0.1 M NaOH<br>(0.1 M NO <sub>3</sub> <sup>-</sup> )                              | 209.4 μmol h <sup>-1</sup> cm <sup>-2</sup> @-0.6                   | 82.4%@-0.6                   | [15]                 |
| La-Co <sub>3</sub> O <sub>4</sub> /CC                    | 0.1 M NaOH<br>(100 mM NO <sub>3</sub> <sup>-</sup> )                             | 537.44 μmol h <sup>-1</sup> cm <sup>-2</sup> @-<br>0.4              | 96.34%@-0.4                  | [16]                 |
| NiCoO <sub>2</sub> @Cu                                   | 0.1 M KOH<br>(0.1 M NO <sub>3</sub> <sup>-</sup> )                               | 349.6 μmol h <sup>-1</sup> cm <sup>-2</sup> @-0.9                   | 94.2%@-0.9                   | [17]                 |
| CoPc/CNT                                                 | 0.1 M NaOH<br>(0.1 M NO <sub>3</sub> <sup>-</sup> )                              | /                                                                   | 70%@-0.37                    | [18]                 |
| Cu <sub>50</sub> Ni <sub>50</sub>                        | 0.1 M NaOH<br>(10 mM NO <sub>3</sub> <sup>-</sup> )                              | /                                                                   | 84.0 ± 2.0%                  | [19]                 |
| VCu-Au <sub>1</sub> Cu SAAS                              | 0.1 M NaOH<br>(7.14 mM NO <sub>3</sub> <sup>-</sup> )                            | 32.6 μmol h <sup>-1</sup> cm <sup>-2</sup> @-0.2                    | 98.7%@-0.2                   | [20]                 |

---

|                                    |                                                                      |                                                 |            |      |
|------------------------------------|----------------------------------------------------------------------|-------------------------------------------------|------------|------|
| Fe <sub>2</sub> P@NiP <sub>2</sub> | 0.2 M Na <sub>2</sub> SO <sub>4</sub><br>(0.05 M NaNO <sub>3</sub> ) | 395 μmol h <sup>-1</sup> cm <sup>-2</sup> @-0.7 | 97.2%@-0.7 | [21] |
| 1-Cu/CC                            | 0.1 M NaOH<br>(0.1 M NaNO <sub>3</sub> )                             | 66 μmol h <sup>-1</sup> cm <sup>-2</sup> @-0.9  | 85.4%@-0.9 | [22] |
| Cu/Ce <sub>2</sub> O <sub>3</sub>  | 0.1 M NaOH<br>(0.01 M NaNO <sub>3</sub> )                            | 386 μmol h <sup>-1</sup> cm <sup>-2</sup> @-1.2 | 73.0%@-1.2 | [23] |



---

## References

- [1] D. Zhu, L.H. Zhang, R.E. Ruther, R.J. Hamers, Photo-illuminated diamond as a solid-state source of solvated electrons in water for nitrogen reduction, *Nat. Mater.* 12(9) (2013) 836-841.
- [2] L. C. Green, D. A. Wagner, J. Glogowski, P. L. Skipper, J. S. Wishnok and S. R. Tannenbaum, Tannenbaum, Analysis of nitrate, nitrite, and [15N] nitrate in biological fluids, *Anal. Biochem.*, 126 (1982) 131-138.
- [3] B. Deepa, N. Balasubramanian, K.S. Nagaraja, Spectrophotometric determination of hydrazine, *Asian J. Chem.* 17(2) (2005) 1140-1146.
- [4] F.L. Zhao, G.T. Hai, X. Li, Z.Y. Jiang, H.H. Wang, Enhanced electrocatalytic nitrate reduction to ammonia on cobalt oxide nanosheets via multiscale defect modulation, *Chem. Eng. J.* 461 (2023) 10.
- [5] Y. Yu, C.H. Wang, Y.F. Yu, Y.T. Wang, B. Zhang, Promoting selective electroreduction of nitrates to ammonia over electron-deficient Co modulated by rectifying Schottky contacts, *Sci. China-Chem.* 63(10) (2020) 1469-1476.
- [6] L.S. Xie, S.J. Sun, L. Hu, J. Chen, J. Li, L. Ouyang, Y.S. Luo, A.A. Alshehri, Q.Q. Kong, Q. Liu, X.P. Sun, In Situ Derived Co<sub>2</sub>B Nanosheet Array: A High-Efficiency Electrocatalyst for Ambient Ammonia Synthesis via Nitrate Reduction, *ACS Appl. Mater. Interfaces* (2022) 8.
- [7] S. Zhang, M. Li, J.C. Li, Q.N. Song, X. Liu, High-ammonia selective metal-organic framework-derived Co-doped Fe/Fe<sub>2</sub>O catalysts for electrochemical nitrate reduction, *Proc. Natl. Acad. Sci. U. S. A.* 119(6) (2022) 11.

- 
- [8] J. Chen, Q. Zhou, L.C. Yue, D.L. Zhao, L.C. Zhang, Y.S. Luo, Q. Liu, N. Li, A.A. Alshehri, M.S. Hamdy, F. Gong, X.P. Sun, Co-NCNT nanohybrid as a highly active catalyst for the electroreduction of nitrate to ammonia, *Chem. Commun.* 58(23) (2022) 3787-3790.
- [9] T. Xie, X.H. Li, J. Li, J. Chen, S.J. Sun, Y.S. Luo, Q. Liu, D.L. Zhao, C.G. Xu, L.S. Xie, X.P. Sun, Co Nanoparticles Decorated Corncob-Derived Biomass Carbon as an Efficient Electrocatalyst for Nitrate Reduction to Ammonia, *Inorg. Chem.* 61(35) (2022) 14195-14200.
- [10] D. Reyter, G. Chamoulaud, D. Bélanger, L. Roué, Electrocatalytic reduction of nitrate on copper electrodes prepared by high-energy ball milling, *J. Electroanal. Chem.* 596(1) (2006) 13-24.
- [11] P.P. Huang, T.T. Fan, X.T. Ma, J.G. Zhang, Y.P. Zhang, Z. Chen, X.D. Yi, 3D Flower-Like Zinc Cobaltite for Electrocatalytic Reduction of Nitrate to Ammonia under Ambient Conditions, *ChemSusChem* 15(4) (2022) 9.
- [12] T.Y. Jiang, Y.H. Liu, D.X. Zhang, Q.T. Chen, L.X. Li, N.Y. Liu, C.X. Zhou, L.H. Li, B.D. Mao, Core-Shell Engineering Boosted Active Hydrogen Generation in  $\text{Cu}_{2-x}\text{S}/\text{MoS}_2$  Quantum Dots for Efficient Electrocatalytic Nitrate Reduction to Ammonia, *ACS Sustain. Chem. Eng.* 12(15) (2024) 5979-5990.
- [13] M.H. Ye, X.L. Jiang, Y.G. Zhang, Y. Liu, Y.X. Liu, L. Zhao, Enhanced Electrocatalytic Nitrate Reduction to Ammonia Using Functionalized Multi-Walled Carbon Nanotube-Supported Cobalt Catalyst, *Nanomaterials* 14(1) (2024) 15.
- [14] X. Zhao, Z. Zhu, Y.N. He, H.B. Zhang, X.H. Zhou, W.B. Hu, M. Li, S.S. Zhang,

---

Y.M. Dong, X. Hu, A. Kuklin, G. Baryshnikov, H. Ågren, T. Wågberg, G.Z. Hu, Simultaneous anchoring of Ni nanoparticles and single-atom Ni on BCN matrix promotes efficient conversion of nitrate in water into high-value-added ammonia, *Chem. Eng. J.* 433 (2022) 12.

[15] A.M. Liu, G.X. Li, J.H. Cao, F. Zhao, X.R. Chen, Q.Q. Hua, L.G. Gao, T.L. Ma, X.F. Ren, Preparation of Ru-doped Cu-based catalysts for enhanced electrochemical ammonia synthesis from efficient electrocatalytic nitrate reduction, *Catal. Sci. Technol.* 13(21) (2023) 6313-6320.

[16] X. He, T. Xie, K. Dong, J. Nan, H. Sun, Y.C. Yao, X.Y. Fan, D.D. Zheng, Y.S. Luo, S.J. Sun, Q. Liu, L.M. Li, W. Chu, L.S. Xie, Q.Q. Kong, X.P. Sun, Enhancing nitrate electroreduction for ammonia production over electron-deficient  $\text{Co}_3\text{O}_4$  with La doping regulation, *Sci. China-Mater.* (2024) 8.

[17] Y. Hai, X.M. Li, Y. Cao, X.Y. Wang, L.H. Meng, Y. Yang, M. Luo, Ammonia Synthesis via Electrocatalytic Nitrate Reduction Using  $\text{NiCoO}_2$  Nanoarrays on a Copper Foam, *ACS Appl. Mater. Interfaces* 16(9) (2024) 11431-11439.

[18] N.J. Harmon, J. Li, B.T. Wang, Y.Z. Gao, H.L. Wang, Influence of Carbon Nanotube Support on Electrochemical Nitrate Reduction Catalyzed by Cobalt Phthalocyanine Molecules, *ACS Catal.* 14(5) (2024) 3575-3581.

[19] Y.H. Wang, A. Xu, Z.Y. Wang, L.S. Huang, J. Li, F.W. Li, J. Wicks, M.C. Luo, D.H. Nam, C.S. Tan, Y. Ding, J.W. Wu, Y.W. Lum, C.T. Dinh, D. Sinton, G.F. Zheng, E.H. Sargent, Enhanced Nitrate-to-Ammonia Activity on Copper-Nickel Alloys via Tuning of Intermediate Adsorption, *J. Am. Chem. Soc.* 142(12) (2020)

---

5702-5708.

[20] Y.Z. Zhang, X. Chen, W.L. Wang, L.F. Yin, J.C. Crittenden, Electrocatalytic nitrate reduction to ammonia on defective Au<sub>1</sub>Cu (111) single-atom alloys, *Appl. Catal. B-Environ.* 310 (2022) 11.

[21] Y.N. Zheng, Y. Tan, X. Yu, H. Yao, S.J. Hu, J. Hu, Z. Chen, X.H. Guo, Optimized Intermediates Adsorption Configuration on Co-Doped Fe<sub>2</sub>P@NiP<sub>2</sub> Heterojunction Interface for Enhanced Electrocatalytic Nitrate-To-Ammonia Conversion, *Small* (2024) 10.

[22] Y.T. Xu, M.Y. Xie, H.Q. Zhong, Y. Cao, In-Situ Clustering of Single-Atom Copper Precatalysts in a Metal-Organic Framework for Efficient Electrocatalytic Nitrate-to-Ammonia Reduction, *ACS Catal.* 12(14) (2022) 8698-8706.

[23] D. Li, F. Wang, J. Mao, Surface-Reconstructed Copper Foil Free-Standing Electrode with Nanoflower Cu/Ce<sub>2</sub>O<sub>3</sub> by In Situ Electrodeposition Reduction for Electrocatalytic Nitrate Reduction to Ammonia, *Inorg. Chem.* 62(40) (2023) 16283-16287.
